# Supplementary material for: A novel protective role of sacubitril/valsartan in cyclophosphamide induced lung injury in rats: impact of miRNA-150-3p on NF-κB/MAPK signaling trajectories
Source: PubMed Central journal article supplement (PMC7400763; doi:10.1038/s41598-020-69810-5), 2020-08-03
Supplement: 41598_2020_69810_MOESM1_ESM.pdf [file 41598_2020_69810_MOESM1_ESM.pdf]

## **A novel protective role of sacubitril/valsartan in cyclophosphamide induced lung injury in rats: Impact of miRNA-150-3p on NF- $\kappa$ B/MAPK signaling trajectories**

Ghada A. Abdel-Latif <sup>a,h\*</sup>, Azza H. Abd Elwahab <sup>b</sup>, Rehab A. Hasan <sup>c</sup>, Noura F. ElMongy <sup>d</sup>, Maggie M. Ramzy <sup>e</sup>, Manal L. Louka <sup>f</sup>, Mona F. Schaalang<sup>g,h</sup>

<sup>a</sup> *Pharmacology & Toxicology Department, Faculty of Pharmacy, Misr International University (MIU), Cairo, Egypt*

<sup>b</sup> *Physiology Department, Faculty of Medicine for Girls, Al-Azhar University, Cairo, Egypt*

<sup>c</sup> *Histology Department, Faculty of Medicine for Girls, Al-Azhar University, Cairo, Egypt*

<sup>d</sup> *Physiology Department, Faculty of Medicine, Al-Azhar University, Damietta, Egypt*

<sup>e</sup> *Biochemistry Department, Faculty of Medicine, Minia University, Egypt*

<sup>f</sup> *Medical Biochemistry department, Faculty of medicine, Ain Shams University, Cairo, Egypt*

<sup>g</sup> *Pharmacy Practice & Clinical Pharmacy Department, Faculty of Pharmacy, Misr International University (MIU), Cairo, Egypt*

<sup>h</sup> *Translational and Clinical Research Unit, Faculty of Pharmacy, Misr International University (MIU), Cairo, Egypt*

P-P38

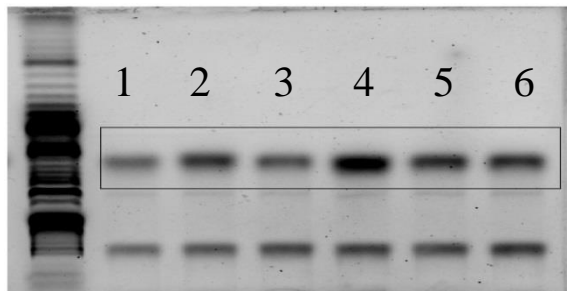

T-P38

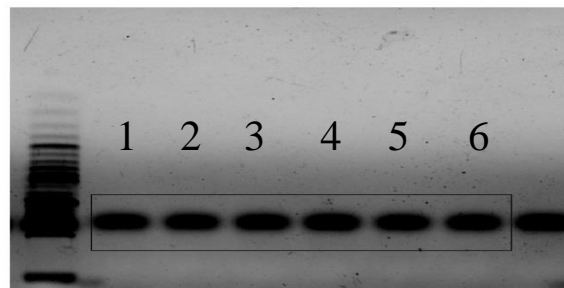

P-ERK1/2

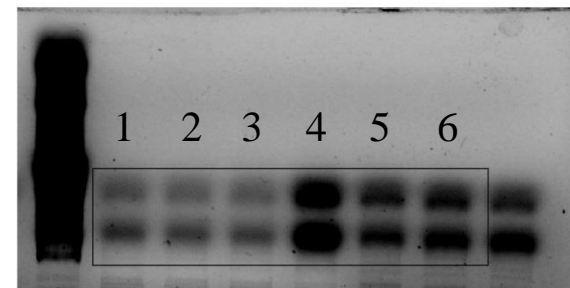

T-ERK1/2

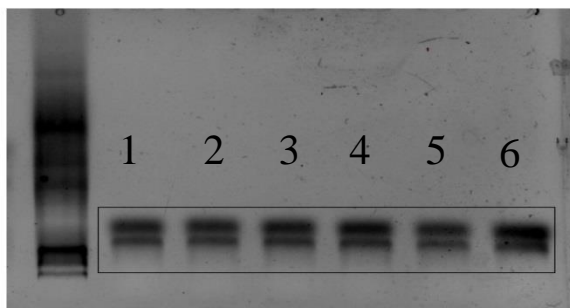

B-actin

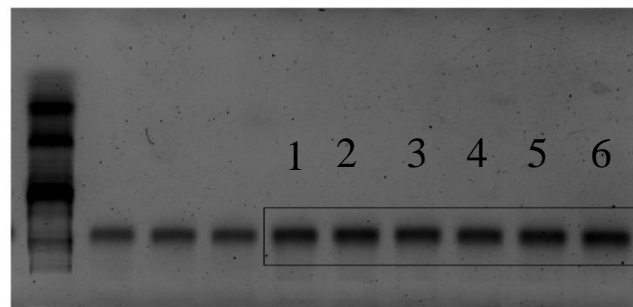

**Key for blots images:**

- 1- Control
- 2- ENT
- 3- VAL
- 4- CP
- 5- ENT + CP
- 6- VAL + CP
